# Supplementary material
Source: PubMed Central journal article supplement (PMC3682407)
Supplement: NIHMS447860-supplement-supplemental_digital_content.pdf [file NIHMS447860-supplement-supplemental_digital_content.pdf]

**SUPPLEMENTAL DIGITAL CONTENT**

**Supplementary Table 1. Characteristics of PAPI Study and Sinai Hospital of Baltimore Participants**

| Characteristic (units)                  | Amish PAPI*  |              | Sinai Hospital of Baltimore |              |
|-----------------------------------------|--------------|--------------|-----------------------------|--------------|
|                                         | Men          | Women        | Men                         | Women        |
| Number (n)                              | 276          | 290          | 209                         | 141          |
| Age ± SD (yr)                           | 44.3 ± 12.8  | 46.7 ± 13.6  | 63.4 ± 10.8                 | 66.6 ± 10.6  |
| BMI ± SD (kg/m <sup>2</sup> )           | 25.9 ± 3.7   | 28.0 ± 5.3   | 30.3 ± 5.9                  | 31.0 ± 7.0   |
| Systolic blood pressure ± SD (mmHg)     | 116.1 ± 11.7 | 116.4 ± 13.6 | 136.5 ± 19.5                | 141.7 ± 20.6 |
| Diastolic blood pressure ± SD (mmHg)    | 70.6 ± 7.3   | 69.4 ± 7.3   | 73.6 ± 13.0                 | 69.6 ± 13.8  |
| Hypertension (%) <sup>†</sup>           | 4.4          | 5.5          | 76.4                        | 86.4         |
| Total cholesterol ± SD (mg/dl)          | 207.5 ± 43.5 | 216.4 ± 50.8 | NA                          | NA           |
| LDL-cholesterol ± SD (mg/dl)            | 138.7 ± 40.3 | 139.4 ± 47.0 | NA                          | NA           |
| HDL-cholesterol ± SD (mg/dl)            | 55.3 ± 14.8  | 62.0 ± 15.3  | NA                          | NA           |
| Triglycerides ± SD (mg/dl) <sup>‡</sup> | 67.7 ± 38.1  | 74.9 ± 41.5  | NA                          | NA           |
| Hypercholesterolemia (%) <sup>§</sup>   | 25.0         | 26.2         | 83.3                        | 82.0         |
| Taking aspirin (%)                      | 2.2          | 1.0          | 100                         | 100          |
| Proton pump inhibitor use (%)           | 0.7          | 0.0          | 21.5                        | 33.1         |
| Self-reported diabetes (%)              | 1.1          | 0.7          | 32.1                        | 46.4         |
| Hematocrit ± SD (%)                     | 41.5 ± 2.4   | 37.6 ± 2.3   | 42.3 ± 5.7                  | 38.3 ± 5.0   |
| White blood cell count ± SD (n x 1,000) | 6.1 ± 1.5    | 6.1 ± 1.4    | 7.7 ± 6.0                   | 9.1 ± 14.2   |
| Platelet count ± SD (n x 100,000)       | 239.1 ± 43.3 | 246.9 ± 50.5 | 221.8 ± 66.3                | 252.1 ± 67.7 |
| Current smoker (%) <sup>  </sup>        | 20.1         | 0.0          | 24.6                        | 15.0         |

Abbreviations: BMI, body mass index; HDL, high-density lipoprotein; LDL, low-density lipoprotein; NA, not available; PAPI, Pharmacogenomics of Anti-platelet Intervention; SD, standard deviation.

SI conversion factors: To convert HDL-cholesterol, LDL-cholesterol, and total cholesterol values to mmol/L, multiply by 0.0259; triglycerides to mmol/L, multiply by 0.0113.

\*For PAPI Study, all participants were withdrawn from prescription and nonprescription medications, vitamins, and supplements 7 days prior to and for the duration of the study. Participants taking anti-hypertensive, lipid-lowering, and diabetes medications accounted for less than 2% of participants.

<sup>†</sup>Defined as systolic blood pressure greater than 140 mm Hg or diastolic blood pressure greater than 90 mm Hg or taking prescription medication for previously diagnosed hypertension.

<sup>‡</sup>Logarithm-transformed for analysis and back-transformed for presentation.

<sup>§</sup>Defined as LDL-cholesterol greater than 160 mg/dl or taking prescription medication for previously diagnosed hypercholesterolemia.

<sup>||</sup>Self-reported history of smoking cigarette, pipe, or cigar.
